# Supplementary material for: An integrative transcriptome analysis framework for drug efficacy and similarity reveals drug-specific signatures of anti-TNF treatment in a mouse model of inflammatory polyarthritis
Source: PLoS Comput Biol. 2019 May 9;15(5):e1006933. doi: 10.1371/journal.pcbi.1006933 (PMC6508611; doi:10.1371/journal.pcbi.1006933)
Supplement: S1 Code — (RMD) [file pcbi.1006933.s014.rmd]

α---
title: Integrative transcriptome analysis of anti-TNF intervention in a mouse model of inflammatory polyarthritis as a framework for drug efficiency and similarity 
author: Ksanthi Kranidioti, Nikos Fikas, Maria Tsochatzidou, Panagiotis Chouvardas, Maria Denis, George Kollias, Niki Karagianni and Christoforos Nikolaou
date: October 2018
version: v4 
output:
  pdf_document: default
  html_document: default
  word_document: default
---

# Outline/Guidelines
In this file we provide the detailed code used in the analyses that we performed in the context of our paper. This includes all pre-processing steps, the implementation of clustering and classification models, the functional analysis as well as the code that was used to generate all the figures in the main paper and supplementary material. 
Ιn order to replicate all the analyses presented below you will need to download locally the Supplementary Files containing the raw and log-fold change data. These are provided in a zipped folder under the name Supplement/. The user needs to download and extract this folder, then navigate in it by using the correct path (which is here set as: Supplement/).
Note that minor differences in axes names, legends and colours may exist.

# Loading of necessary R libraries
The libraries below are necessary for the perfomance of the analyses. If the user gets an error in any step, he/she is advised to install the libraries with the use of the install.packages() function.

```{r setup, echo=FALSE}
# libraries used
source("https://bioconductor.org/biocLite.R")
biocLite("preprocessCore")
library(multcomp)
library(partykit)
library(gplots)
library(rpart)
library(MASS)
library(stats)
library(randomForest)
library(UpSetR)
library(ggfortify)
library(ggplot2)
library(RColorBrewer)
library(heatmap.plus)
library(arules)
library(knitr)
library(gProfileR)
library(preprocessCore)
library(multcomp)
library(tsne)
library(factoextra)
library(NbClust)
library(beanplot)
library(ggpubr)
```


# Data Normalization
All measurements were converted to gene space by calculating mean probeset values referring to the same genes. Only values from genes that were measured in all samples were finally included in the dataset which consisted of 18704 common measured genes in all 66 samples. 
(Supplementary File: Exp1234_raw_common18704genes_antiTNF.tsv)


# ANOVA with Dunnett's test
The code below describes the application of ANOVA and Dunnett's test on the raw (de-logged) microarray data. An initial step of quantile normalization is followed by the ANOVA. As the execution can take a while the user can skip this section as its output is provided as supplementary file. If the user wants to execute the following chunk, the option "include" should be changed to TRUE.
```{r Analysis of expression data with ANOVA coupled with Dunnett's test, include=FALSE}
library(multcomp)
data<-read.delim("Supplement/Exp1234_raw_common18704genes_antiTNF.tsv", header=T, sep="\t")
genes=data$Gene
library("preprocessCore")
normalize.quantiles(as.matrix(data[,c(2:67)]),copy=TRUE)->matrix
# A should be control!!!! # Order should be alphabetical
# Part 1: Using Wt as control
Group <- factor(c(rep("A_Wt",10), rep("B_Tg",13), rep("C_RemProph",3), rep("D_RemTher",10), rep("E_HumTher",10), rep("F_EnbTher",10), rep("G_CimTher",10)))
x<-vector(length(matrix[,1]),mode="numeric")
lfcTgWt=vector(length(matrix[,1]),mode="numeric")
pTgWt=vector(length(matrix[,1]),mode="numeric")
lfcRemPWt=vector(length(matrix[,1]),mode="numeric")
pRemPWt=vector(length(matrix[,1]),mode="numeric")
lfcRemWt=vector(length(matrix[,1]),mode="numeric")
pRemWt=vector(length(matrix[,1]),mode="numeric")
lfcHumWt=vector(length(matrix[,1]),mode="numeric")
pHumWt=vector(length(matrix[,1]),mode="numeric")
lfcEnbWt=vector(length(matrix[,1]),mode="numeric")
pEnbWt=vector(length(matrix[,1]),mode="numeric")
lfcCimWt=vector(length(matrix[,1]),mode="numeric")
pCimWt=vector(length(matrix[,1]),mode="numeric")
for(i in 1:length(matrix[,1])){
	if (i %% 100 == 0) {cat("iteration =", i, "\n")}
	Value <- unname(unlist(matrix[i,1:66])) 
#
	data <- data.frame(Group, Value)
	aov <- aov(Value ~ Group, data)
	set.seed(123456789)
	Dunnett<-summary(glht(aov, linfct=mcp(Group="Dunnett")))
#
	TgWt=Dunnett[[10]]$coefficients[1]
		if(2^TgWt>1) {lfcTgWt[i]=log2(2^TgWt)}
		if(2^TgWt<1) {lfcTgWt[i]=-log2(1/2^TgWt)}
	pTgWt[i]=Dunnett[[10]]$pvalues[1]
#
	RemPWt=Dunnett[[10]]$coefficients[2]
		if(2^RemPWt>1) {lfcRemPWt[i]=log2(2^RemPWt)}
		if(2^RemPWt<1) {lfcRemPWt[i]=-log2(1/2^RemPWt)}
	pRemPWt[i]=Dunnett[[10]]$pvalues[2]
#
	RemWt=Dunnett[[10]]$coefficients[3]
		if(2^RemWt>1) {lfcRemWt[i]=log2(2^RemWt)}
		if(2^RemWt<1) {lfcRemWt[i]=-log2(1/2^RemWt)}
	pRemWt[i]=Dunnett[[10]]$pvalues[3]
#
	HumWt=Dunnett[[10]]$coefficients[4]
		if(2^HumWt>1) {lfcHumWt[i]=log2(2^HumWt)}
		if(2^HumWt<1) {lfcHumWt[i]=-log2(1/2^HumWt)}
	pHumWt[i]=Dunnett[[10]]$pvalues[4]
#
	EnbWt=Dunnett[[10]]$coefficients[5]
		if(2^EnbWt>1) {lfcEnbWt[i]=log2(2^EnbWt)}
		if(2^EnbWt<1) {lfcEnbWt[i]=-log2(1/2^EnbWt)}
	pEnbWt[i]=Dunnett[[10]]$pvalues[5]
#
	CimWt=Dunnett[[10]]$coefficients[6]
		if(2^CimWt>1) {lfcCimWt[i]=log2(2^CimWt)}
		if(2^CimWt<1) {lfcCimWt[i]=-log2(1/2^CimWt)}
	pCimWt[i]=Dunnett[[10]]$pvalues[6]
}

#
# Part 2: Using Tg as control
matrix<-matrix[,c(11:23,1:10,24:66)]
Group <- factor(c(rep("A_Tg",13), rep("B_Wt",10), rep("C_RemProph",3), rep("D_RemTher",10), rep("E_HumTher",10), rep("F_EnbTher",10), rep("G_CimTher",10)))
x<-vector(length(matrix[,1]),mode="numeric")
lfcWtTg=vector(length(matrix[,1]),mode="numeric")
pWtTg=vector(length(matrix[,1]),mode="numeric")
lfcRemPTg=vector(length(matrix[,1]),mode="numeric")
pRemPTg=vector(length(matrix[,1]),mode="numeric")
lfcRemTg=vector(length(matrix[,1]),mode="numeric")
pRemTg=vector(length(matrix[,1]),mode="numeric")
lfcHumTg=vector(length(matrix[,1]),mode="numeric")
pHumTg=vector(length(matrix[,1]),mode="numeric")
lfcEnbTg=vector(length(matrix[,1]),mode="numeric")
pEnbTg=vector(length(matrix[,1]),mode="numeric")
lfcCimTg=vector(length(matrix[,1]),mode="numeric")
pCimTg=vector(length(matrix[,1]),mode="numeric")
for(i in 1:length(matrix[,1])){
	if (i %% 100 == 0) {cat("iteration =", i, "\n")}
	Value <- unname(unlist(matrix[i,1:66])) 
#
	data <- data.frame(Group, Value)
	aov <- aov(Value ~ Group, data)
	set.seed(123456789)
	Dunnett<-summary(glht(aov, linfct=mcp(Group="Dunnett")))
#
	WtTg=Dunnett[[10]]$coefficients[1]
		if(2^WtTg>1) {lfcWtTg[i]=log2(2^WtTg)}
		if(2^WtTg<1) {lfcWtTg[i]=-log2(1/2^WtTg)}
	pWtTg[i]=Dunnett[[10]]$pvalues[1]
#
	RemPTg=Dunnett[[10]]$coefficients[2]
		if(2^RemPTg>1) {lfcRemPTg[i]=log2(2^RemPTg)}
		if(2^RemPTg<1) {lfcRemPTg[i]=-log2(1/2^RemPTg)}
	pRemPTg[i]=Dunnett[[10]]$pvalues[2]
#
	RemTg=Dunnett[[10]]$coefficients[3]
		if(2^RemTg>1) {lfcRemTg[i]=log2(2^RemTg)}
		if(2^RemTg<1) {lfcRemTg[i]=-log2(1/2^RemTg)}
	pRemTg[i]=Dunnett[[10]]$pvalues[3]
#
	HumTg=Dunnett[[10]]$coefficients[4]
		if(2^HumTg>1) {lfcHumTg[i]=log2(2^HumTg)}
		if(2^HumTg<1) {lfcHumTg[i]=-log2(1/2^HumTg)}
	pHumTg[i]=Dunnett[[10]]$pvalues[4]
#
	EnbTg=Dunnett[[10]]$coefficients[5]
		if(2^EnbTg>1) {lfcEnbTg[i]=log2(2^EnbTg)}
		if(2^EnbTg<1) {lfcEnbTg[i]=-log2(1/2^EnbTg)}
	pEnbTg[i]=Dunnett[[10]]$pvalues[5]
#
	CimTg=Dunnett[[10]]$coefficients[6]
		if(2^CimTg>1) {lfcCimTg[i]=log2(2^CimTg)}
		if(2^CimTg<1) {lfcCimTg[i]=-log2(1/2^CimTg)}
	pCimTg[i]=Dunnett[[10]]$pvalues[6]
}

# Joing data in one data.frame
datadunnett<-data.frame(Gene=genes, "log2FC_Tg/Wt"=lfcTgWt, "pvalue_Tg/Wt"=pTgWt, "log2FC_RemP/Wt"=lfcRemPWt, "pvalue_RemP/Wt"=pRemWt, "log2FC_Rem/Wt"=lfcRemWt, "pvalue_Rem/Wt"=pRemWt, "log2FC_Hum/Wt"=lfcHumWt, "pvalue_Hum/Wt"=pHumWt, "log2FC_Enb/Wt"=lfcEnbWt, "pvalue_Enb/Wt"=pEnbWt, "log2FC_Cim/Wt"=lfcCimWt, "pvalue_Cim/Wt"=pCimWt, "log2FC_Wt/Tg"=lfcWtTg, "pvalue_Wt/Tg"=pWtTg, "log2FC_RemP/Tg"=lfcRemPTg, "pvalue_RemP/Tg"=pRemTg, "log2FC_Rem/Tg"=lfcRemTg, "pvalue_Rem/Tg"=pRemTg, "log2FC_Hum/Tg"=lfcHumTg, "pvalue_Hum/Tg"=pHumTg, "log2FC_Enb/Tg"=lfcEnbTg, "pvalue_Enb/Tg"=pEnbTg, "log2FC_Cim/Tg"=lfcCimTg, "pvalue_Cim/Tg"=pCimTg) 

#Exporting data.frame to a new file called:Dunnett_antiTNF_vs_Wt_and_Tg.tsv
write.table(datadunnett, file="Supplement/Dunnett_antiTNF_vs_Wt_and_Tg.tsv", quote=F, row.names=F, sep="\t")
```

# Differential Expression Analysis
Reading of log-foldchange data after an ANOVA followed by Dunnett's test. A function for selection of DE genes according to logFC and p-value thresholds is introduced and applied on each condition. The dataset is exported from the previous code chunk, but is also provided directly as Supplementary File: Dunnett_antiTNF_vs_Wt_and_Tg.tsv.
```{r DEG calculations}
data<-read.delim("Supplement/Dunnett_antiTNF_vs_Wt_and_Tg.tsv", header=T)
cim<-62:67
enb<-52:57
hum<-42:47
rem<-28:34
remp<-25:27
tg<-12:18
wt<-2:8
corindexes<-c(wt, tg, remp, rem, hum, enb, cim)
#
# Function to get Differentially Expressed Genes with given thresholds for abs(log(FC)) and p-value
getdeg<-function(data,logfc,pvalue){which(abs(data[,2])>=logfc & data[,3]<=pvalue)->i; return(i)}
tgdegs<-0
tgdegs<-c(tgdegs,getdeg(data[,1:3], 1, 0.05))
tgdegs<-tgdegs[2:length(tgdegs)]
tgdegnames<-data[tgdegs,1]
#
degs<-0;
for(i in 1:6){
  x<-i*2
  y<-i*2+1
degs<-c(degs,getdeg(data[,c(1,x,y)], 1, 0.05))
}
degs<-unique(degs)
degs<-degs[2:length(degs)]
degnames<-data[degs,1]
#
totaldegs<-0;
for(i in 1:12){
  x<-i*2
  y<-i*2+1
totaldegs<-c(totaldegs,getdeg(data[,c(1,x,y)], 1, 0.05))
}
totaldegs<-unique(totaldegs)
totaldegs<-totaldegs[2:length(totaldegs)]
totaldegnames<-data[totaldegs,1]
```

# Clustering of differentially expressed genes (Figure 1A)
Agglomerative hierarchical clustering using Ward's minimum variance criterion for both genes and conditions.
```{r TgDeg Heatmap}
hcols<-colorRampPalette(c("steelblue4","white","firebrick4"))(256)
pcols<-c("firebrick4", "red", "dark orange", "gold","dark green", "dodgerblue", "blue", "magenta", "darkorchid4")
m<-heatmap.2(as.matrix(data[tgdegs,seq(from=2, to=12, by=2)]), col=hcols, labRow="", tracecol="black", vline=0, mar=c(8,5), hclustfun = function(x) hclust(x,method = 'ward.D2'))
mt<-as.hclust(m$rowDendrogram);cutree(mt, k=8)->tgcluster;table(tgcluster)
treatments<-c("Disease", "Infliximab3w", "Infliximab6w", "Adalimumab6w", "Etanercept6w", "Certolizumab6w")
heatmap.2(as.matrix(data[tgdegs,seq(from=2, to=12, by=2)]), col=hcols, labRow="", tracecol="black", vline=0, mar=c(10,2), hclustfun = function(x) hclust(x,method = 'ward.D2'), density.info="none", key.xlab = "log2(FC)", labCol = treatments, RowSideColors = pcols[tgcluster])
```

## Beanplots for DE gene clusters (Supplementary Figure 2)
```{r TgDeg Beanplots}
library(beanplot)
par(mfrow=c(2,4))
par(mar=c(3,5,3,1))
for (i in c(6,5,4,3,2,8,7,1)){
  j<-as.numeric(names(which(tgcluster==i)))
  beanplot(data[j,c(2,4,6,8,10,12)], names=c("Dis","Infl3","Infl6","Adal6","Etan6", "Cert6"), what=c(0,1,1,0), col=pcols[i], horizontal=T, main=paste("Cluster", i), las=1, ylim=c(-3,3));abline(v=0, lty=3, lwd=1, col="black")
}
```


# Functional Analysis (Figure 1C)
Functional Analysis was performed at the levels of GO terms (BP: Biological Process, MF: Molecular Function, CC: Cellular Component), KEGG pathways and Transcription Factor targets. The gProfileR library was used in all cases.
The code below is used to re-create Figure 1B but the full list of enriched terms can also be compiled by storing the output in stable files instead of temporary (temp).
```{r, Disease-Associated Gened Functional Analysis}
totalresults<-0
totalcols<-0
funcanal<-function(genes, clusters, species){
  funclist<-list()
  cl<-as.numeric(names(table(cluster)))
  for (i in 1:length(cl)){
    querygenes<-as.character(genes[which(cluster==cl[i])])
    funcs<-gprofiler(query=querygenes, organism = species, significant=T)[,c(9,12,4,3)]
    funclist<-list(funclist, c(paste("Cluster",cl[i]), funcs))
  }
  return(funclist)
}
cl<-as.numeric(names(table(tgcluster)))
#
for(i in c(6,5,4,3,2,7,1)){
gprofiler(query=as.character(tgdegnames[which(tgcluster==cl[i])]), organism="mmusculus", significant=T, src_filter="GO:BP")[,c(9,12, 4,3)]->gobp
gprofiler(query=as.character(tgdegnames[which(tgcluster==cl[i])]), organism="mmusculus", significant=T, src_filter="GO:MF")[,c(9,12, 4,3)]->gomf
gprofiler(query=as.character(tgdegnames[which(tgcluster==cl[i])]), organism="mmusculus", significant=T, src_filter="GO:CC")[,c(9,12, 4,3)]->gocc
gprofiler(query=as.character(tgdegnames[which(tgcluster==cl[i])]), organism="mmusculus", significant=T, src_filter="TF")[,c(9,12, 4,3)]->tf
gprofiler(query=as.character(tgdegnames[which(tgcluster==cl[i])]), organism="mmusculus", significant=T, src_filter="KEGG")[,c(9,12, 4,3)]->kegg
rbind(kegg, tf, gobp, gomf, gocc)->all
# write to file temp (temporary)
write.table(all, file="Supplement/temp", row.names = F, sep="\t", quote=F, col.names = T)
# read from temp
results<-read.delim("Supplement/temp", header=T, sep="\t")
grep("TF:", results$term.id)->tf
grep("GO:", results$term.id)->go
grep("KEGG:", results$term.id)->kegg
results[kegg,]->kegg
results[tf,]->tf
results[go,]->go
kegg[order(kegg$p.value),]->kegg
go[order(go$p.value),]->go
tf[order(tf$p.value),]->tf
strsplit(as.character(tf$term.name), ": ")->ll
sapply(ll, "[[", 2)->ll
strsplit(as.character(ll), ";")->ll
sapply(ll, "[[", 1)->tf$term.name
if(length(tf$term.id)>0){
unique(tf$term.name)->uniqtf
tfout<-0;for(ik in 1:length(uniqtf)){which(as.character(tf$term.name)==as.character(uniqtf[ik]))->nn; tfn<-tf[nn,]; which(tfn$p.value==min(tfn$p.value))->inn; tfout<-rbind(tfout,head(tfn[inn,],1))};tfout[2:length(tfout[,1]),]->tf
}
results<-rbind(head(kegg,10),head(go,10),head(tf,10))
totalresults<-rbind(totalresults,results)
n<-length(results$term.id)
totalcols<-c(totalcols, rep(pcols[i],n))
}
totalresults<-totalresults[2:length(totalresults[,1]),]
totalcols<-totalcols[2:length(totalcols)]
par(mar=c(5,15,1,2));barplot(rev(-log10(totalresults$p.value[75:126])),xlab="-log10(p-value)",ylab="",cex.main=1.3, cex.lab=0.9, cex.axis=0.9, main="Under-Expressed Clusters", col=rev(totalcols[75:126]), horiz=T, names=rev(totalresults$term.name[75:126]), las=1, cex.names = 0.6);
par(mar=c(5,15,1,2));barplot(rev(-log10(totalresults$p.value[1:74])),xlab="-log10(p-value)",ylab="",cex.main=1.3, cex.lab=0.9, cex.axis=0.9, main="Over-Expressed Clusters", col=rev(totalcols[1:74]), horiz=T, names=rev(totalresults$term.name[1:74]), las=1, cex.names = 0.6);
```


# Profile Similarity Calculation (Figure 1D)
Profile similarity/distance was assessed in the form of the mean absolute difference of gene expression as log2FC. Profile distance from wild-type (Wt) was used as a proxy for treatment efficiency, calculated for the entire set of differentially expressed genes, as well as for the various clusters.  
```{r Mean Distance from Wt Analysis}
# Function for distance calculation
distmat<-function(data, columns, column_names){
  hcols<-colorRampPalette(c("steelblue4","white","firebrick4"))(256)
  distm<-matrix(0, nrow=length(columns), ncol=length(columns))
  for (i in 1:length(columns)){
    for (j in 1:length(columns)){
      distm[i,j]<-mean(abs(data[,columns[i]]-data[,columns[j]]))
    }
  }
  return(distm)
}

# distance analysis calculated per cluster 
cm<-matrix(0, nrow=9, ncol=5)
cm[1,]<-distmat(data[tgdegs,], c(14,16,18,20,22,24), treatments)[1,2:6]
for(i in 2:9){
cm[i,]<-distmat(data[tgdegs[which(tgcluster==(i-1))],], c(14,16,18,20,22,24), treatments)[1,2:6]
}
cm<-cm[c(1,7,6,5,4,3,9,8,2),]
rcols<-c("black", pcols[1:8])[c(1,7,6,5,4,3,9,8,2)]
clusternames<-c("AllGenes","Over-InflProph","Over-Infl", "Over-PartialRestore", "Under-AdaEtanCert-ProphRev", "Under-AdaEtanCert", "Under-InflProph","Under-PartialRestore", "Under-Infl")
heatmap.2(cm, labRow = clusternames, labCol = treatments[2:6], hclustfun = function(x) hclust(x,method = 'ward.D2'), trace="none", Rowv=NA, cellnote = round(cm, digits=2), notecex = 1.3, notecol = "black", density.info = "none", key.xlab = "Distance from Wt", mar=c(10,18), col=hcols[129:256], RowSideColors = rcols, cexCol=1.3, cexRow=1.3)
```


# Total Differentially Expressed Genes (Figure 2A, Supplementary Figure 3)
Analysis of gene sets in order to call for Restored, Not Restored, Altered Genes, is followed by the analysis of differential expression correlations and total sums of the three gene classes per treatment. 
```{r Restored-NotRestored-Altered Genes}
tgwtdeg<-getdeg(data[,1:3], 1, 0.05)
rempwtdeg<-getdeg(data[,c(1,4,5)], 1, 0.05)
remwtdeg<-getdeg(data[,c(1,6,7)], 1, 0.05)
humwtdeg<-getdeg(data[,c(1,8,9)], 1, 0.05)
enbwtdeg<-getdeg(data[,c(1,10,11)], 1, 0.05)
cimwtdeg<-getdeg(data[,c(1,12,13)], 1, 0.05)
#
wttgdeg<-getdeg(data[,c(1,14,15)], 1, 0.05)
remptgdeg<-getdeg(data[,c(1,16,17)], 1, 0.05)
remtgdeg<-getdeg(data[,c(1,18,19)], 1, 0.05)
humtgdeg<-getdeg(data[,c(1,20,21)], 1, 0.05)
enbtgdeg<-getdeg(data[,c(1,22,23)], 1, 0.05)
cimtgdeg<-getdeg(data[,c(1,24,25)], 1, 0.05)
#
# Gene category classification
tab<-0
tab<-rbind(tab, c(length(setdiff(tgwtdeg, rempwtdeg)), length(tgwtdeg)-length(setdiff(tgwtdeg, rempwtdeg)), length(union(setdiff(remptgdeg, wttgdeg), setdiff(rempwtdeg, tgwtdeg)))))
tab<-rbind(tab, c(length(setdiff(tgwtdeg, remwtdeg)), length(tgwtdeg)-length(setdiff(tgwtdeg, remwtdeg)), length(union(setdiff(remtgdeg, wttgdeg), setdiff(remwtdeg, tgwtdeg)))))
tab<-rbind(tab, c(length(setdiff(tgwtdeg, humwtdeg)), length(tgwtdeg)-length(setdiff(tgwtdeg, humwtdeg)), length(union(setdiff(humtgdeg, wttgdeg), setdiff(humwtdeg, tgwtdeg)))))
tab<-rbind(tab, c(length(setdiff(tgwtdeg, enbwtdeg)), length(tgwtdeg)-length(setdiff(tgwtdeg, enbwtdeg)), length(union(setdiff(enbtgdeg, wttgdeg), setdiff(enbwtdeg, tgwtdeg)))))
tab<-rbind(tab, c(length(setdiff(tgwtdeg, cimwtdeg)), length(tgwtdeg)-length(setdiff(tgwtdeg, cimwtdeg)), length(union(setdiff(cimtgdeg, wttgdeg), setdiff(cimwtdeg, tgwtdeg)))))
tab<-tab[2:6,]
colnames(tab)<-c("Restored","NotRestored", "Altered")
row.names(tab)<-c("Infliximab 3w", "Infliximab 6w", "Adalimumab 6w", "Etanercept 6w", "Certolizumab 6w")
#barplot(t(tab), beside=T)
# Barplot showing relative numbers of affected genes
d<-0
for(i in 1:3){for (j in 1:5){d<-rbind(d,data.frame(Outcome=colnames(tab)[i], Treatment=rownames(tab)[j], NoGenes=tab[j,i]))}}
d<-d[2:16,]
n<-c(1,4,7,10,13,2,5,8,11,14,3,6,9,12,15)
ggplot(d, aes(fill=reorder(Outcome,rev(n)), y=NoGenes, x=Treatment))+geom_bar( stat="identity")+coord_flip()+scale_fill_manual(values=c("steelblue3", "firebrick3", "forestgreen"))

# 2D scatterplots - Comparison to Tg/Wt values
par(mfrow=c(2,3))
# Infliximab 3w
remprestored<-setdiff(tgwtdeg, rempwtdeg)
rempnotrestored<-setdiff(tgwtdeg,(setdiff(tgwtdeg,rempwtdeg)))
rempaltered<-union(setdiff(remptgdeg, wttgdeg), setdiff(rempwtdeg, tgwtdeg))
#
plot(data[remprestored, c(2,4)], main="Infliximab 3w", cex.main=2, pch=19, cex=1.1, col=alpha("forestgreen", 0.5), type="p", xlab="Disease vs Wt", ylab="Treatment vs Wt", cex.axis=1.3, cex.lab=1.5, las=1, xlim=c(-3,3), ylim=c(-3,3));abline(coef = c(0,1), lty=3, lwd=2); lines(data[rempnotrestored, c(2,4)], pch=19, cex=1.1, col=alpha("firebrick3", 0.5), type="p"); lines(data[rempaltered, c(2,4)], pch=19, cex=1.1, col=alpha("steelblue3", 0.5), type="p");
x<-unique(c(remprestored, rempnotrestored, rempaltered));lm(data[x, c(4,2)])->lmfit;abline(lmfit, lty=1, lwd=3); text(1.5,-2.5, paste("Slope=",round(lmfit$coefficients[2],digits=2)), cex=1.3)
#
# Infliximab 6w
remrestored<-setdiff(tgwtdeg, remwtdeg)
remnotrestored<-setdiff(tgwtdeg,(setdiff(tgwtdeg,remwtdeg)))
remaltered<-union(setdiff(remtgdeg, wttgdeg), setdiff(remwtdeg, tgwtdeg))
#
plot(data[remrestored, c(2,6)], main="Infliximab 6w", cex.main=2, pch=19, cex=1.1, col=alpha("forestgreen", 0.5), type="p", xlab="Disease vs Wt", ylab="Treatment vs Wt", cex.axis=1.3, cex.lab=1.5, las=1, xlim=c(-3,3), ylim=c(-3,3));abline(coef = c(0,1), lty=3, lwd=2); lines(data[remnotrestored, c(2,6)], pch=19, cex=1.1, col=alpha("firebrick3", 0.5), type="p"); lines(data[remaltered, c(2,6)], pch=19, cex=1.1, col=alpha("steelblue3", 0.5), type="p");
x<-unique(c(remrestored, remnotrestored, remaltered));lm(data[x, c(6,2)])->lmfit;abline(lmfit, lty=1, lwd=3); text(1.5,-2.5, paste("Slope=",round(lmfit$coefficients[2],digits=2)), cex=1.3)
#
# Adalimumab 6w
humrestored<-setdiff(tgwtdeg, humwtdeg)
humnotrestored<-setdiff(tgwtdeg,(setdiff(tgwtdeg,humwtdeg)))
humaltered<-union(setdiff(humtgdeg, wttgdeg), setdiff(humwtdeg, tgwtdeg))
#
plot(data[humrestored, c(2,8)], main="Adalimumab 6w", cex.main=2, pch=19, cex=1.1, col=alpha("forestgreen", 0.5), type="p", xlab="Disease vs Wt", ylab="Treatment vs Wt", cex.axis=1.3, cex.lab=1.5, las=1, xlim=c(-3,3), ylim=c(-3,3));abline(coef = c(0,1), lty=3, lwd=2); lines(data[humnotrestored, c(2,8)], pch=19, cex=1.1, col=alpha("firebrick3", 0.5), type="p"); lines(data[humaltered, c(2,8)], pch=19, cex=1.1, col=alpha("steelblue3", 0.5), type="p");
x<-unique(c(humrestored, humnotrestored, humaltered));lm(data[x, c(8,2)])->lmfit;abline(lmfit, lty=1, lwd=3); text(1.5,-2.5, paste("Slope=",round(lmfit$coefficients[2],digits=2)), cex=1.3)
#
# Etanercept 6w
enbrestored<-setdiff(tgwtdeg, enbwtdeg)
enbnotrestored<-setdiff(tgwtdeg,(setdiff(tgwtdeg,enbwtdeg)))
enbaltered<-union(setdiff(enbtgdeg, wttgdeg), setdiff(enbwtdeg, tgwtdeg))
#
plot(data[enbrestored, c(2,10)], main="Etanercept 6w", cex.main=2, pch=19, cex=1.1, col=alpha("forestgreen", 0.5), type="p", xlab="Disease vs Wt", ylab="Treatment vs Wt", cex.axis=1.3, cex.lab=1.5, las=1, xlim=c(-3,3), ylim=c(-3,3));abline(coef = c(0,1), lty=3, lwd=2); lines(data[enbnotrestored, c(2,10)], pch=19, cex=1.1, col=alpha("firebrick3", 0.5), type="p"); lines(data[enbaltered, c(2,10)], pch=19, cex=1.1, col=alpha("steelblue3", 0.5), type="p");
x<-unique(c(enbrestored, enbnotrestored, enbaltered));lm(data[x, c(10,2)])->lmfit;abline(lmfit, lty=1, lwd=3); text(1.5,-2.5, paste("Slope=",round(lmfit$coefficients[2],digits=2)), cex=1.3)
#
# Certolizumab pegol 6w
cimrestored<-setdiff(tgwtdeg, cimwtdeg)
cimnotrestored<-setdiff(tgwtdeg,(setdiff(tgwtdeg,cimwtdeg)))
cimaltered<-union(setdiff(cimtgdeg, wttgdeg), setdiff(cimwtdeg, tgwtdeg))
#
plot(data[cimrestored, c(2,12)], main="Certolizumab 6w", cex.main=2, pch=19, cex=1.1, col=alpha("forestgreen", 0.5), type="p", xlab="Disease vs Wt", ylab="Treatment vs Wt", cex.axis=1.3, cex.lab=1.5, las=1, xlim=c(-3,3), ylim=c(-3,3));abline(coef = c(0,1), lty=3, lwd=2); lines(data[cimnotrestored, c(2,12)], pch=19, cex=1.1, col=alpha("firebrick3", 0.5), type="p"); lines(data[cimaltered, c(2,12)], pch=19, cex=1.1, col=alpha("steelblue3", 0.5), type="p");
x<-unique(c(cimrestored, cimnotrestored, cimaltered));lm(data[x, c(12,2)])->lmfit;abline(lmfit, lty=1, lwd=3); text(1.5,-2.5, paste("Slope=",round(lmfit$coefficients[2],digits=2)), cex=1.3)
```


## Analysis of Set Intersections (Figure 2B, 2C, 2D)
Set intersections were created with UpSetR. The set images are accompanied by representative logFC heatmaps. 
```{r Set Intersections}
# Set Intersections with UpSetR (Not Restored Genes)
setmat<-matrix(0, nrow=length(data[,1]), ncol=6)
setmat[wttgdeg,1]<-1
setmat[rempnotrestored,2]<-1
setmat[remnotrestored,3]<-1
setmat[humnotrestored,4]<-1
setmat[enbnotrestored,5]<-1
setmat[cimnotrestored,6]<-1
setdatamat<-data.frame(Genes=data[,1], Disease=setmat[,1], Infliximab3w=setmat[,2], Infliximab6w=setmat[,3], Adalimumab6w=setmat[,4], Etanercept6w=setmat[,5], Cimzia6w=setmat[,6])
upset(setdatamat, nsets=6, order.by = "freq", main.bar.color = "gray13", mainbar.y.label = "Common Genes", sets.bar.color = c("Black","Red", "Dark Red", "Dark blue", "Dark green", "Dark orange"), matrix.dot.alpha = 0.5, matrix.color = "gray13", keep.order = T)
#
testg<-(which(setdatamat[,2]==1 & setdatamat[,4]==1 & setdatamat[,5]==1 & setdatamat[,6]==1 & setdatamat[,7]==1))
#
heatmap.2(as.matrix(data[testg,c(2,4,6,8,10,12)]), scale="none", labRow = data[testg,1], labCol = treatments, col=hcols, trace ="none", mar=c(10,5))
#
# Set Intersections with UpSetR (Altered Genes)
setmat<-matrix(0, nrow=length(data[,1]), ncol=6)
setmat[wttgdeg,1]<-1
setmat[rempaltered,2]<-1
setmat[remaltered,3]<-1
setmat[humaltered,4]<-1
setmat[enbaltered,5]<-1
setmat[cimaltered,6]<-1
setdatamat<-data.frame(Genes=data[,1], Disease=setmat[,1], Infliximab3w=setmat[,2], Infliximab6w=setmat[,3], Adalimumab6w=setmat[,4], Etanercept6w=setmat[,5], Cimzia6w=setmat[,6])
upset(setdatamat, nsets=6, order.by = "freq", main.bar.color = "gray13", mainbar.y.label = "Common Genes", sets.bar.color = c("Black","Red", "Dark Red", "Dark blue", "Dark green", "Dark orange"), matrix.dot.alpha = 0.5, matrix.color = "gray13", keep.order = T)
#
testg<-which((setdatamat[,3]==1))
#
heatmap.2(as.matrix(data[testg,c(2,4,6,8,10,12)]), scale="none", labRow = data[testg,1], labCol = treatments, col=hcols, trace ="none", mar=c(10,5))
#

```


# Differential Expression patterns of Total DE genes (Supplementary Figure 4)
Clustering Analysis for total DE genes (including disease associated) as in Figure 1A.
```{r Supplementary Total DE Genes Heatmap}
treatments<-c("Disease", "Infliximab3w", "Infliximab6w", "Adalimumab6w", "Etanercept6w", "Certolizumab6w")
totalwtdegs<-unique(c(rempwtdeg, remwtdeg,humwtdeg,enbwtdeg,cimwtdeg))
#
altered<-setdiff(totalwtdegs, tgdegs)
#
totalaltered<-union(altered,tgdegs)
#
hcols<-colorRampPalette(c("steelblue4","white","firebrick4"))(256)
pcols2<-c("firebrick4", "red", "dark orange", "gold", "green", "dark green", "dodgerblue", "blue", "magenta", "darkorchid4")
m<-heatmap.2(as.matrix(data[totalaltered,c(2,4,6,8,10,12)]), col=hcols, labRow="", tracecol="black", vline=0, mar=c(8,5), hclustfun = function(x) hclust(x,method = 'ward.D2'))
mt<-as.hclust(m$rowDendrogram);cutree( mt, k=10)->altcluster;table(altcluster)
heatmap.2(as.matrix(data[totalaltered,c(2,4,6,8,10,12)]), col=hcols, labRow="", tracecol="black", vline=0, mar=c(12,5), hclustfun = function(x) hclust(x,method = 'ward.D2'), density.info="none", key.xlab = "log2(FC)", labCol = treatments, RowSideColors = pcols2[altcluster])
```

# Distance from Wt for Total DE genes (Supplementary Figure 5)
Identical analysis to Figure 1D but for the total of DE genes split in 10 clusters.
```{r Supplementary Total DE Genes Distance Heatmap}
distmat<-function(data, columns, column_names){
  hcols<-colorRampPalette(c("steelblue4","white","firebrick4"))(256)
  distm<-matrix(0, nrow=length(columns), ncol=length(columns))
  for (i in 1:length(columns)){
    for (j in 1:length(columns)){
      distm[i,j]<-mean(abs(data[,columns[i]]-data[,columns[j]]))
    }
  }
  return(distm)
}
# distance analysis calculated per cluster against Tg/Wt
cm<-matrix(0, nrow=11, ncol=5)
cm[1,]<-distmat(data[totalaltered,], c(14,16,18,20,22,24), treatments)[1,2:6]
for(i in 2:11){
cm[i,]<-distmat(data[totalaltered[which(altcluster==(i-1))],], c(14,16,18,20,22,24), treatments)[1,2:6]
}
heatmap.2(cm, labRow = c("AllGenes", paste("Cluster",seq(1:10))), labCol = treatments[2:6], hclustfun = function(x) hclust(x,method = 'ward.D2'), trace="none",  cellnote = round(cm, digits=2), notecex = 1.5, notecol = "black", density.info = "none", key.xlab = "Distance from Wt", mar=c(13,8), col=hcols[129:256], RowSideColors = c("black", pcols2[1:10]), cexCol=1.7, cexRow=1.7, Rowv=NA)
```

# Functional Analysis of Total DE genes (Supplementary Figure 6)
This is conducted in the same way as for the disease associated genes, with the use of gProfileR package but in this case with the incorporation of not-restored and altered genes as well.
```{r, Altered Genes Functional Analysis}
ixx<-humrestored
gprofiler(query=as.character(data[ixx,1]), organism="mmusculus", significant=T, src_filter="GO:BP")[,c(9,12, 4,3)]->gobp
gprofiler(query=as.character(data[ixx,1]), organism="mmusculus", significant=T, src_filter="GO:MF")[,c(9,12, 4,3)]->gomf
gprofiler(query=as.character(data[ixx,1]), organism="mmusculus", significant=T, src_filter="GO:CC")[,c(9,12, 4,3)]->gocc
gprofiler(query=as.character(data[ixx,1]), organism="mmusculus", significant=T, src_filter="TF")[,c(9,12, 4,3)]->tf
gprofiler(query=as.character(data[ixx,1]), organism="mmusculus", significant=T, src_filter="KEGG")[,c(9,12, 4,3)]->kegg
rbind(kegg, tf, gobp, gomf, gocc)->all
# write to file temp
write.table(all, file="Supplement/temp", row.names = F, sep="\t", quote=F, col.names = T)
# read from temp
results<-read.delim("Supplement/temp", header=T, sep="\t")
grep("TF:", results$term.id)->tf
grep("GO:", results$term.id)->go
grep("KEGG:", results$term.id)->kegg
results[kegg,]->kegg
results[tf,]->tf
results[go,]->go
kegg[order(kegg$p.value),]->kegg
go[order(go$p.value),]->go
tf[order(tf$p.value),]->tf
strsplit(as.character(tf$term.name), ": ")->ll
sapply(ll, "[[", 2)->ll
strsplit(as.character(ll), ";")->ll
sapply(ll, "[[", 1)->tf$term.name
if(length(tf$term.id)>0){
unique(tf$term.name)->uniqtf
tfout<-0;for(ik in 1:length(uniqtf)){which(as.character(tf$term.name)==as.character(uniqtf[ik]))->nn; tfn<-tf[nn,]; which(tfn$p.value==min(tfn$p.value))->inn; tfout<-rbind(tfout,head(tfn[inn,],1))};tfout[2:length(tfout[,1]),]->tf
}
results<-rbind(head(kegg,10),head(go,10),head(tf,10))
n<-length(results$term.id)
par(mar=c(5,20,3,2));plot(y=c(1:n),x=rev(-log10(results$p.value[1:n])), pch=19, yaxt="n",xlab="-log10(p-value)",ylab="", main="Restored", cex.main=1.3, cex.lab=1.3, cex.axis=1.5, cex=1.3, col="forestgreen") ; axis(2, at=1:n, labels=rev(results$term.name[1:n]),las=1, cex.axis=1.3)

#
ixx<-humnotrestored
gprofiler(query=as.character(data[ixx,1]), organism="mmusculus", significant=T, src_filter="GO:BP")[,c(9,12, 4,3)]->gobp
gprofiler(query=as.character(data[ixx,1]), organism="mmusculus", significant=T, src_filter="GO:MF")[,c(9,12, 4,3)]->gomf
gprofiler(query=as.character(data[ixx,1]), organism="mmusculus", significant=T, src_filter="GO:CC")[,c(9,12, 4,3)]->gocc
gprofiler(query=as.character(data[ixx,1]), organism="mmusculus", significant=T, src_filter="TF")[,c(9,12, 4,3)]->tf
gprofiler(query=as.character(data[ixx,1]), organism="mmusculus", significant=T, src_filter="KEGG")[,c(9,12, 4,3)]->kegg
rbind(kegg, tf, gobp, gomf, gocc)->all
# write to file temp
write.table(all, file="Supplement/temp", row.names = F, sep="\t", quote=F, col.names = T)
# read from temp
results<-read.delim("Supplement/temp", header=T, sep="\t")
grep("TF:", results$term.id)->tf
grep("GO:", results$term.id)->go
grep("KEGG:", results$term.id)->kegg
results[kegg,]->kegg
results[tf,]->tf
results[go,]->go
kegg[order(kegg$p.value),]->kegg
go[order(go$p.value),]->go
tf[order(tf$p.value),]->tf
strsplit(as.character(tf$term.name), ": ")->ll
sapply(ll, "[[", 2)->ll
strsplit(as.character(ll), ";")->ll
sapply(ll, "[[", 1)->tf$term.name
if(length(tf$term.id)>0){
unique(tf$term.name)->uniqtf
tfout<-0;for(ik in 1:length(uniqtf)){which(as.character(tf$term.name)==as.character(uniqtf[ik]))->nn; tfn<-tf[nn,]; which(tfn$p.value==min(tfn$p.value))->inn; tfout<-rbind(tfout,head(tfn[inn,],1))};tfout[2:length(tfout[,1]),]->tf
}
results<-rbind(head(kegg,10),head(go,10),head(tf,10))
n<-length(results$term.id)
par(mar=c(5,20,3,2));plot(y=c(1:n),x=rev(-log10(results$p.value[1:n])), pch=19, yaxt="n",xlab="-log10(p-value)",ylab="", main="Not Restored", cex.main=1.3, cex.lab=1.3, cex.axis=1.5, cex=1.3, col="firebrick3") ; axis(2, at=1:n, labels=rev(results$term.name[1:n]),las=1, cex.axis=1.3)
#
ixx<-humaltered
gprofiler(query=as.character(data[ixx,1]), organism="mmusculus", significant=T, src_filter="GO:BP")[,c(9,12, 4,3)]->gobp
gprofiler(query=as.character(data[ixx,1]), organism="mmusculus", significant=T, src_filter="GO:MF")[,c(9,12, 4,3)]->gomf
gprofiler(query=as.character(data[ixx,1]), organism="mmusculus", significant=T, src_filter="GO:CC")[,c(9,12, 4,3)]->gocc
gprofiler(query=as.character(data[ixx,1]), organism="mmusculus", significant=T, src_filter="TF")[,c(9,12, 4,3)]->tf
gprofiler(query=as.character(data[ixx,1]), organism="mmusculus", significant=T, src_filter="KEGG")[,c(9,12, 4,3)]->kegg
rbind(kegg, tf, gobp, gomf, gocc)->all
# write to file temp
write.table(all, file="Supplement/temp", row.names = F, sep="\t", quote=F, col.names = T)
# read from temp
results<-read.delim("Supplement/temp", header=T, sep="\t")
grep("TF:", results$term.id)->tf
grep("GO:", results$term.id)->go
grep("KEGG:", results$term.id)->kegg
results[kegg,]->kegg
results[tf,]->tf
results[go,]->go
kegg[order(kegg$p.value),]->kegg
go[order(go$p.value),]->go
tf[order(tf$p.value),]->tf
strsplit(as.character(tf$term.name), ": ")->ll
sapply(ll, "[[", 2)->ll
strsplit(as.character(ll), ";")->ll
sapply(ll, "[[", 1)->tf$term.name
if(length(tf$term.id)>0){
unique(tf$term.name)->uniqtf
tfout<-0;for(ik in 1:length(uniqtf)){which(as.character(tf$term.name)==as.character(uniqtf[ik]))->nn; tfn<-tf[nn,]; which(tfn$p.value==min(tfn$p.value))->inn; tfout<-rbind(tfout,head(tfn[inn,],1))};tfout[2:length(tfout[,1]),]->tf
}
results<-rbind(head(kegg,10),head(go,10),head(tf,10))
n<-length(results$term.id)
par(mar=c(5,20,3,2));plot(y=c(1:n),x=rev(-log10(results$p.value[1:n])), pch=19, yaxt="n",xlab="-log10(p-value)",ylab="", main="Altered", cex.main=1.3, cex.lab=1.3, cex.axis=1.5, cex=1.3, col="steelblue3") ; axis(2, at=1:n, labels=rev(results$term.name[1:n]),las=1, cex.axis=1.3)
```
# Functional Analysis of Total DE genes (Supplementary Figure 6)
This is conducted in the same way as for the disease associated genes, with the use of gProfileR package but in this case with the incorporation of not-restored and altered genes as well.
```{r, Altered Genes Functional Analysis}
ixx<-humrestored
gprofiler(query=as.character(data[ixx,1]), organism="mmusculus", significant=T, src_filter="GO:BP")[,c(9,12, 4,3)]->gobp
gprofiler(query=as.character(data[ixx,1]), organism="mmusculus", significant=T, src_filter="GO:MF")[,c(9,12, 4,3)]->gomf
gprofiler(query=as.character(data[ixx,1]), organism="mmusculus", significant=T, src_filter="GO:CC")[,c(9,12, 4,3)]->gocc
gprofiler(query=as.character(data[ixx,1]), organism="mmusculus", significant=T, src_filter="TF")[,c(9,12, 4,3)]->tf
gprofiler(query=as.character(data[ixx,1]), organism="mmusculus", significant=T, src_filter="KEGG")[,c(9,12, 4,3)]->kegg
rbind(kegg, tf, gobp, gomf, gocc)->all
# write to file temp
write.table(all, file="Supplement/temp", row.names = F, sep="\t", quote=F, col.names = T)
# read from temp
results<-read.delim("Supplement/temp", header=T, sep="\t")
grep("TF:", results$term.id)->tf
grep("GO:", results$term.id)->go
grep("KEGG:", results$term.id)->kegg
results[kegg,]->kegg
results[tf,]->tf
results[go,]->go
kegg[order(kegg$p.value),]->kegg
go[order(go$p.value),]->go
tf[order(tf$p.value),]->tf
strsplit(as.character(tf$term.name), ": ")->ll
sapply(ll, "[[", 2)->ll
strsplit(as.character(ll), ";")->ll
sapply(ll, "[[", 1)->tf$term.name
if(length(tf$term.id)>0){
unique(tf$term.name)->uniqtf
tfout<-0;for(ik in 1:length(uniqtf)){which(as.character(tf$term.name)==as.character(uniqtf[ik]))->nn; tfn<-tf[nn,]; which(tfn$p.value==min(tfn$p.value))->inn; tfout<-rbind(tfout,head(tfn[inn,],1))};tfout[2:length(tfout[,1]),]->tf
}
results<-rbind(head(kegg,10),head(go,10),head(tf,10))
n<-length(results$term.id)
par(mar=c(5,20,3,2));plot(y=c(1:n),x=rev(-log10(results$p.value[1:n])), pch=19, yaxt="n",xlab="-log10(p-value)",ylab="", main="Restored", cex.main=1.3, cex.lab=1.3, cex.axis=1.5, cex=1.3, col="forestgreen") ; axis(2, at=1:n, labels=rev(results$term.name[1:n]),las=1, cex.axis=1.3)

#
ixx<-humnotrestored
gprofiler(query=as.character(data[ixx,1]), organism="mmusculus", significant=T, src_filter="GO:BP")[,c(9,12, 4,3)]->gobp
gprofiler(query=as.character(data[ixx,1]), organism="mmusculus", significant=T, src_filter="GO:MF")[,c(9,12, 4,3)]->gomf
gprofiler(query=as.character(data[ixx,1]), organism="mmusculus", significant=T, src_filter="GO:CC")[,c(9,12, 4,3)]->gocc
gprofiler(query=as.character(data[ixx,1]), organism="mmusculus", significant=T, src_filter="TF")[,c(9,12, 4,3)]->tf
gprofiler(query=as.character(data[ixx,1]), organism="mmusculus", significant=T, src_filter="KEGG")[,c(9,12, 4,3)]->kegg
rbind(kegg, tf, gobp, gomf, gocc)->all
# write to file temp
write.table(all, file="Supplement/temp", row.names = F, sep="\t", quote=F, col.names = T)
# read from temp
results<-read.delim("Supplement/temp", header=T, sep="\t")
grep("TF:", results$term.id)->tf
grep("GO:", results$term.id)->go
grep("KEGG:", results$term.id)->kegg
results[kegg,]->kegg
results[tf,]->tf
results[go,]->go
kegg[order(kegg$p.value),]->kegg
go[order(go$p.value),]->go
tf[order(tf$p.value),]->tf
strsplit(as.character(tf$term.name), ": ")->ll
sapply(ll, "[[", 2)->ll
strsplit(as.character(ll), ";")->ll
sapply(ll, "[[", 1)->tf$term.name
if(length(tf$term.id)>0){
unique(tf$term.name)->uniqtf
tfout<-0;for(ik in 1:length(uniqtf)){which(as.character(tf$term.name)==as.character(uniqtf[ik]))->nn; tfn<-tf[nn,]; which(tfn$p.value==min(tfn$p.value))->inn; tfout<-rbind(tfout,head(tfn[inn,],1))};tfout[2:length(tfout[,1]),]->tf
}
results<-rbind(head(kegg,10),head(go,10),head(tf,10))
n<-length(results$term.id)
par(mar=c(5,20,3,2));plot(y=c(1:n),x=rev(-log10(results$p.value[1:n])), pch=19, yaxt="n",xlab="-log10(p-value)",ylab="", main="Not Restored", cex.main=1.3, cex.lab=1.3, cex.axis=1.5, cex=1.3, col="firebrick3") ; axis(2, at=1:n, labels=rev(results$term.name[1:n]),las=1, cex.axis=1.3)
#
ixx<-humaltered
gprofiler(query=as.character(data[ixx,1]), organism="mmusculus", significant=T, src_filter="GO:BP")[,c(9,12, 4,3)]->gobp
gprofiler(query=as.character(data[ixx,1]), organism="mmusculus", significant=T, src_filter="GO:MF")[,c(9,12, 4,3)]->gomf
gprofiler(query=as.character(data[ixx,1]), organism="mmusculus", significant=T, src_filter="GO:CC")[,c(9,12, 4,3)]->gocc
gprofiler(query=as.character(data[ixx,1]), organism="mmusculus", significant=T, src_filter="TF")[,c(9,12, 4,3)]->tf
gprofiler(query=as.character(data[ixx,1]), organism="mmusculus", significant=T, src_filter="KEGG")[,c(9,12, 4,3)]->kegg
rbind(kegg, tf, gobp, gomf, gocc)->all
# write to file temp
write.table(all, file="Supplement/temp", row.names = F, sep="\t", quote=F, col.names = T)
# read from temp
results<-read.delim("Supplement/temp", header=T, sep="\t")
grep("TF:", results$term.id)->tf
grep("GO:", results$term.id)->go
grep("KEGG:", results$term.id)->kegg
results[kegg,]->kegg
results[tf,]->tf
results[go,]->go
kegg[order(kegg$p.value),]->kegg
go[order(go$p.value),]->go
tf[order(tf$p.value),]->tf
strsplit(as.character(tf$term.name), ": ")->ll
sapply(ll, "[[", 2)->ll
strsplit(as.character(ll), ";")->ll
sapply(ll, "[[", 1)->tf$term.name
if(length(tf$term.id)>0){
unique(tf$term.name)->uniqtf
tfout<-0;for(ik in 1:length(uniqtf)){which(as.character(tf$term.name)==as.character(uniqtf[ik]))->nn; tfn<-tf[nn,]; which(tfn$p.value==min(tfn$p.value))->inn; tfout<-rbind(tfout,head(tfn[inn,],1))};tfout[2:length(tfout[,1]),]->tf
}
results<-rbind(head(kegg,10),head(go,10),head(tf,10))
n<-length(results$term.id)
par(mar=c(5,20,3,2));plot(y=c(1:n),x=rev(-log10(results$p.value[1:n])), pch=19, yaxt="n",xlab="-log10(p-value)",ylab="", main="Altered", cex.main=1.3, cex.lab=1.3, cex.axis=1.5, cex=1.3, col="steelblue3") ; axis(2, at=1:n, labels=rev(results$term.name[1:n]),las=1, cex.axis=1.3)
```


# Combined analysis of Gene Expression with Functional analysis for total DE genes (Not included in manuscript)
```{r Supplementary Altered Genes Functional Analysis}
altereddegnames<-data[totalaltered,1]
cl<-as.numeric(names(table(tgwtcluster)))
#pdf("~/Dropbox/Articles/collaborations/PharmacoTranscriptomics_Biomedcode/Figures/SupplementaryFigure_AlteredGenes_Beanplot_FuncAnal.pdf", height=6, width=14)
for(i in c(1,2,3,4,6,8)){
# beanplot
  j<-as.numeric(names(which(tgwtcluster==i)))
par(mfrow=c(1,2))
par(mar=c(4,5,3,2));beanplot(data[j,c(2,4,6,8,10,12)], names=c("Dis","Infl3","Infl6","Adal6","Etan6", "Cert6"), what=c(0,1,1,0), col=pcols2[i], horizontal=T, main=paste("Cluster", i), las=1, ylim=c(-3,3));abline(v=0, lty=3, lwd=1, col="black")
# Funcanalplot    
gprofiler(query=as.character(altereddegnames[which(tgwtcluster==cl[i])]), organism="mmusculus", significant=T, src_filter="GO:BP")[,c(9,12, 4,3)]->gobp
gprofiler(query=as.character(altereddegnames[which(tgwtcluster==cl[i])]), organism="mmusculus", significant=T, src_filter="GO:MF")[,c(9,12, 4,3)]->gomf
gprofiler(query=as.character(altereddegnames[which(tgwtcluster==cl[i])]), organism="mmusculus", significant=T, src_filter="GO:CC")[,c(9,12, 4,3)]->gocc
gprofiler(query=as.character(altereddegnames[which(tgwtcluster==cl[i])]), organism="mmusculus", significant=T, src_filter="TF")[,c(9,12, 4,3)]->tf
gprofiler(query=as.character(altereddegnames[which(tgwtcluster==cl[i])]), organism="mmusculus", significant=T, src_filter="KEGG")[,c(9,12, 4,3)]->kegg
rbind(kegg, tf, gobp, gomf, gocc)->all
# write to file temp
write.table(all, file="Supplement/temp", row.names = F, sep="\t", quote=F, col.names = T)
# read from temp
results<-read.delim("Supplement/temp", header=T, sep="\t")
grep("TF:", results$term.id)->tf
grep("GO:", results$term.id)->go
grep("KEGG:", results$term.id)->kegg
results[kegg,]->kegg
results[tf,]->tf
results[go,]->go
kegg[order(kegg$p.value),]->kegg
go[order(go$p.value),]->go
tf[order(tf$p.value),]->tf
strsplit(as.character(tf$term.name), ": ")->ll
sapply(ll, "[[", 2)->ll
strsplit(as.character(ll), ";")->ll
sapply(ll, "[[", 1)->tf$term.name
if(length(tf$term.id)>0){
unique(tf$term.name)->uniqtf
tfout<-0;for(ik in 1:length(uniqtf)){which(as.character(tf$term.name)==as.character(uniqtf[ik]))->nn; tfn<-tf[nn,]; which(tfn$p.value==min(tfn$p.value))->inn; tfout<-rbind(tfout,head(tfn[inn,],1))};tfout[2:length(tfout[,1]),]->tf
}
results<-rbind(head(kegg,10),head(go,10),head(tf,10))
n<-length(results$term.id)
par(mar=c(5,15,3,2));plot(y=c(1:n),x=rev(-log10(results$p.value[1:n])), pch=19, yaxt="n",xlab="-log10(p-value)",ylab="", main=paste("Cluster",i), cex.main=1.3, cex.lab=1, cex.axis=1, cex=1, col=pcols2[i]) ; axis(2, at=1:n, labels=rev(results$term.name[1:n]),las=1, cex.axis=1)
}
```

# Classification of interventions with Random Forests

# Reading of raw data
The file below contains a transpsition of the the original data to be used as input in the Random Forest models.
```{r Reading of Raw Data}
tqnormdata<-read.delim("Supplement/Exp1234_raw_common18704genes_transposed_antiTNF.tsv", header=T, sep="\t")
```

# Implementation of Random Forest at gene level (Figure 3A-E)
Full Analysis of Random Forest Classification at gene level. By changing the initial set of samples from x<-1:66 to x<-24:66 the user may exclude Tg, Wt samples and thus confine the analysis on the treatments (Supplementary Figures 7, 8 will be produced in this way).
```{r Random Forest at Gene Level}
# Part 1: Select genes to search for signatures
# All samples
xx<-1:66
# Selected samples (use line below instead of xx<-1:66 to perform analysis on anti-TNF treatments only, without including tg, wt samples)
#xx<-24:66 # only Rem, Hum, Enb, Cim
# A. Total PCA
tqnormdata$State<-c(rep("Wild-type",10),rep("Transgenic", 13),rep("Infliximab3w",3), rep("Infliximab6w",10),rep("Adalimumab6w",10),rep("Etanercept6w",10),rep("Certolizumab6w",10))
testgenes<-which((colnames(tqnormdata) %in% totaldegnames)==T)
tqnormALL<-cbind(State=tqnormdata[xx,1], tqnormdata[xx,testgenes])
factor(tqnormALL$State)->tqnormALL$State
states<-length(table(tqnormALL$State))
pcadataALL<-tqnormALL[,2:length(tqnormALL[1,])]
pcaALL<-prcomp(pcadataALL, scale=T)
pcols<-c("firebrick4", "red", "dark orange", "gold","dark green", "dodgerblue", "blue", "magenta", "darkorchid4")
p<-autoplot(pcaALL, data=tqnormALL, colour="State", frame = TRUE, label = F, main="All Genes")
p+scale_fill_manual(values = pcols) + scale_color_manual(values = pcols)
# Top Genes from RF
testgenes<-which((colnames(tqnormdata) %in% totaldegnames)==T)
tqnormDEG<-cbind(State=tqnormdata[xx,1], tqnormdata[xx,testgenes])
# Part 2: run 100 random forest models and select best
dataRF<-tqnormDEG
factor(dataRF$State)->dataRF$State
factor(tqnormDEG$State)->tqnormDEG$State
states<-length(table(dataRF$State))
varImp<-0;
error<-100;
for(i in 1:100){
  randomForest(State~., data=tqnormDEG)->rf; 
  scalederror<-(rf$confusion[,(states+1)]*rowSums(rf$confusion[,1:states]))/(states+1)	
  if(mean(scalederror)<error){
    error<-mean(scalederror)
    bestmodel<-rf
    varImp<-rf$importance
    }
}  
varImp[order(varImp, decreasing=T),]->varImp
# Part #3 Select top 100 features and plot PCA
n<-100
head(varImp, n)->top
y<-which(colnames(tqnormDEG[x,]) %in% names(top))
tqnormDEG[,y]->pcadata
pca<-prcomp(pcadata, scale=T)

p<-autoplot(pca, data=tqnormDEG, colour="State", frame = TRUE, label = F, main="Top 100 RF genes")
p+scale_fill_manual(values = pcols) + scale_color_manual(values = pcols)
# Variable Importance
par(mar=c(5,6,3,2));plot(y=c(1:30),x=rev(varImp[1:30]), pch=19, yaxt="n",xlab="MeanDecreaseGini",ylab="", main="Top 30 most Important Genes", cex.main=1.7, cex.lab=1.3, cex.axis=1.2, cex=1.3, col="steelblue4") ; axis(2, at=1:30, labels=rev(names(varImp)[1:30]),las=1, cex.axis=1)
heatmap.2(as.matrix(bestmodel$confusion[1:5,1:5]), scale="row", hclustfun = function(x) hclust(x,method = 'ward.D2'), trace="none",  cellnote = round(as.matrix(bestmodel$confusion[1:5,1:5]), digits=2), notecex = 1.5, notecol = "black", density.info = "none", key.xlab = "Number of Samples", mar=c(13,13), col=hcols[129:256], cexCol=1.7, cexRow=1.7)
n<-100
head(varImp, n)->top
y<-which(data[,1] %in% names(top))
#
heatmap.2(as.matrix(data[y,c(2,4,6,8,10,12)]), scale="none", hclustfun = function(x) hclust(x,method = 'ward.D2'), trace="none",  density.info = "none", key.xlab = "log2(FC)", mar=c(12,3), col=hcols, cexCol=1.7, labRow="", labCol = treatments, Colv=NA)
#
cm<-matrix(0, nrow=5, ncol=5)
n<-30;head(varImp, n)->top;y<-which(data[,1] %in% names(top));cm[1,]<-distmat(data[y,], c(14,16,18,20,22,24), treatments)[1,2:6]
n<-100;head(varImp, n)->top;y<-which(data[,1] %in% names(top));cm[2,]<-distmat(data[y,], c(14,16,18,20,22,24), treatments)[1,2:6]
n<-300;head(varImp, n)->top;y<-which(data[,1] %in% names(top));cm[3,]<-distmat(data[y,], c(14,16,18,20,22,24), treatments)[1,2:6]
n<-500;head(varImp, n)->top;y<-which(data[,1] %in% names(top));cm[4,]<-distmat(data[y,], c(14,16,18,20,22,24), treatments)[1,2:6]
cm[5,]<-distmat(data[totaldegs,], c(14,16,18,20,22,24), treatments)[1,2:6]
#
heatmap.2(cm, labRow = c("Top30", "Top100", "Top300","Top500", "All DE"), labCol = treatments[2:6], hclustfun = function(x) hclust(x,method = 'ward.D2'), trace="none", Rowv=NA, cellnote = round(cm, digits=2), notecex = 2, notecol = "black", density.info = "none", key.xlab = "Distance from Wt", mar=c(15,10), col=hcols[129:256], cexCol=2, cexRow=2)
#
```

 
# Gene Expression Levels and Functional Analysis for most important Genes (Supplementary Figure 9)
```{r Beanplot-Functional Analysis of top RF genes}
m<-100
head(varImp, m)->top
names(top)->RFgenes
which((as.character(data[,1]) %in% as.character(RFgenes))==T)->j
par(mar=c(4,5,3,2));beanplot(data[j,c(2,4,6,8,10,12)],  names=c("Dis","Infl3","Infl6","Adal6","Etan6", "Cert6"), xlab="logFC vs Wt", what=c(0,1,1,0), col="dark grey", horizontal=T, main=paste("Top",m," RF genes"), las=1, ylim=c(-3,3));abline(v=0, lty=3, lwd=1, col="black")

# Func. Analysis
gprofiler(query=as.character(RFgenes), organism="mmusculus", significant=T, src_filter="GO:BP")[,c(9,12, 4,3)]->gobp
gprofiler(query=as.character(RFgenes), organism="mmusculus", significant=T, src_filter="GO:MF")[,c(9,12, 4,3)]->gomf
gprofiler(query=as.character(RFgenes), organism="mmusculus", significant=T, src_filter="GO:CC")[,c(9,12, 4,3)]->gocc
gprofiler(query=as.character(RFgenes), organism="mmusculus", significant=T, src_filter="TF")[,c(9,12, 4,3)]->tf
gprofiler(query=as.character(RFgenes), organism="mmusculus", significant=T, src_filter="KEGG")[,c(9,12, 4,3)]->kegg
rbind(kegg, tf, gobp, gomf, gocc)->all
# write to file temp
write.table(all, file="Supplement/temp", row.names = F, sep="\t", quote=F, col.names = T)
# read from temp
results<-read.delim("Supplement/temp", header=T, sep="\t")
grep("TF:", results$term.id)->tf
grep("GO:", results$term.id)->go
grep("KEGG:", results$term.id)->kegg
results[kegg,]->kegg
results[tf,]->tf
results[go,]->go
kegg[order(kegg$p.value),]->kegg
go[order(go$p.value),]->go
tf[order(tf$p.value),]->tf
strsplit(as.character(tf$term.name), ": ")->ll
sapply(ll, "[[", 2)->ll
strsplit(as.character(ll), ";")->ll
sapply(ll, "[[", 1)->tf$term.name
if(length(tf$term.id)>0){
unique(tf$term.name)->uniqtf
tfout<-0;for(ik in 1:length(uniqtf)){which(as.character(tf$term.name)==as.character(uniqtf[ik]))->nn; tfn<-tf[nn,]; which(tfn$p.value==min(tfn$p.value))->inn; tfout<-rbind(tfout,head(tfn[inn,],1))};tfout[2:length(tfout[,1]),]->tf
}
results<-rbind(head(kegg,15),head(go,15),head(tf,15))
n<-length(results$term.id)
par(mar=c(5,20,3,2));plot(y=c(1:n),x=rev(-log10(results$p.value[1:n])), pch=19, yaxt="n",xlab="-log10(p-value)",ylab="", main=paste("Top",m," RF genes"), cex.main=1.3, cex.lab=1, cex.axis=1, cex=1, col="black") ; axis(2, at=1:n, labels=rev(results$term.name[1:n]),las=1, cex.axis=1)
```


# Random Forest Implementation at Functional level (Figure 3F, 3G, Supplementary Figure 10)
This analysis is performed at three different functional categories (KEGG pathways, Transcription Factors and GO). Depending on which level one wants to conduct it the pathways file is chosen accordingly. KEGG Pathways is chosen below as it is the one included in the main paper.
```{r Random Forest at Pathway Level}
pathways<-read.delim("Supplement/KEGG_mmu_pathways.tsv", header=F, sep="\t")
#pathways<-read.delim("Supplement/mm9_TF_targets.tsv", header=F, sep="\t")
#pathways<-read.delim("Supplement/mm9_GO_30_100genes.tsv", header=F, sep="\t")
noGenes<-vector(mode="numeric", length=length(pathways[,1]))
for(i in 1:length(pathways[,1])){
unlist(strsplit(as.character(pathways[i,3]),split=","))->genes
noGenes[i]<-length(genes)
}
pathways<-cbind(kegg=pathways[,1], GeneNo=noGenes, pathway=pathways[,2], genes=as.data.frame(pathways[,3]))
which(pathways$GeneNo>=10)->k
pathways<-pathways[k,]
mat<-matrix(0, nrow=66, ncol=length(k))
for(i in 1:length(k)){
unlist(strsplit(as.character(pathways[i,4]),split=","))->genes
mat[,i]<-apply(tqnormdata[,which(colnames(tqnormdata) %in% genes)], 1, FUN=mean)
}
# Create names of features
names<-gsub("-","_", pathways[,3])
names<-gsub("/","", names)
names<-gsub("\\(","", names)
names<-gsub("\\)","", names)
names<-gsub("–","_", names)
names<-gsub(",","", names)
#
colnames(mat)<-names
dataKEGG<-cbind(State=tqnormdata[,1], as.data.frame(mat))
# apply RF on pathways
xx<-1:66
#xx<-corindexes-1
dataRF<-dataKEGG[xx,]
factor(dataRF$State)->dataRF$State
states<-length(table(dataRF$State))
varImp<-0;
error<-100;
errorprog<-100
for(i in 1:100){
  randomForest(State~., data=dataRF)->rf; 
  scalederror<-(rf$confusion[,(states+1)]*rowSums(rf$confusion[,1:states]))/(states+1)	
  if(mean(scalederror)<error){
    error<-mean(scalederror)
    bestmodel<-rf
    varImp<-rf$importance
    erroprog<-c(errorprog, error)	
    }
}  
varImp[order(varImp, decreasing=T),]->varImp

# Select topX features and PCA
n<-30
head(varImp, n)->top
which(colnames(dataRF) %in% names(top))->x
par(mar=c(5,21,3,2));plot(y=c(1:30),x=rev(varImp[1:30]), pch=19, yaxt="n",xlab="MeanDecreaseGini",ylab="", main="Top 30 KEGG Pathways", cex.main=1.3, cex.lab=1.2, cex.axis=1.1, cex=1.3, col="dark orange") ; axis(2, at=1:30, labels=rev(names(varImp)[1:30]),las=1, cex.axis=0.9)
```

# Two-dimensional Profile Representations (Figure 4A, 4C, Supplementary Figures 11,12)
Input for this Analysis contains a file that has All KEGG and TF terms as well as all GO terms with over than 30 and less than 100 genes (not too small but not very general either). The user needs to choose which category he will analyze based on a simple grep command (see comments in the first lines for instructions). 
```{r 2D Profiles}
# Part 1: Creation of Features
# All GO, KEGG, TF combined
pathways<-read.delim("Supplement/mm9_KEGG_TF_GO_30_100genes.tsv", header=F, sep="\t")
# Select KEGG, TF only
# for KEGG uncomment the command below
pathways<-pathways[union(grep("KEGG_", pathways$V2),grep("TF_", pathways$V2)),]
# for GO uncomment the command below
#pathways<-pathways[union(grep("GO:", pathways$V2),grep("TF_", pathways$V2)),]
# for TF uncomment the command below
#pathways<-pathways[union(grep("TF_", pathways$V2),grep("TF_", pathways$V2)),]

#
noGenes<-vector(mode="numeric", length=length(pathways[,1]))
for(i in 1:length(pathways[,1])){
unlist(strsplit(as.character(pathways[i,3]),split=","))->genes
noGenes[i]<-length(genes)
}
pathways<-cbind(kegg=pathways[,1], GeneNo=noGenes, pathway=pathways[,2], genes=as.data.frame(pathways[,3]))
which(pathways$GeneNo>=10)->k
pathways<-pathways[k,]
mat<-matrix(0, nrow=66, ncol=length(k))
for(i in 1:length(k)){
unlist(strsplit(as.character(pathways[i,4]),split=","))->genes
mat[,i]<-apply(tqnormdata[,which(colnames(tqnormdata) %in% genes)], 1, FUN=mean)
}
# Create names of features
names<-gsub("-","_", pathways[,3])
names<-gsub("/","", names)
names<-gsub("\\(","", names)
names<-gsub("\\)","", names)
names<-gsub("–","_", names)
names<-gsub(",","", names)
#
colnames(mat)<-names
dataKEGG<-cbind(State=tqnormdata[,1], as.data.frame(mat))
#
xx<-1:66
#xx<-corindexes-1
dataRF<-dataKEGG[xx,]
factor(dataRF$State)->dataRF$State
states<-length(table(dataRF$State))
varImp<-0;
error<-100;
errorprog<-100
for(i in 1:100){
  randomForest(State~., data=dataRF)->rf; 
  scalederror<-(rf$confusion[,(states+1)]*rowSums(rf$confusion[,1:states]))/(states+1)	
  if(mean(scalederror)<error){
    error<-mean(scalederror)
    bestmodel<-rf
    varImp<-rf$importance
    erroprog<-c(errorprog, error)	
    }
}  
varImp[order(varImp, decreasing=T),]->varImp
#
par(mar=c(5,25,3,2));plot(y=c(1:50),x=rev(varImp[1:50]), pch=19, yaxt="n",xlab="MeanDecreaseGini",ylab="", main="Top 50 Functional Groups", cex.main=1, cex.lab=1.2, cex.axis=1.1, cex=1.3, col="dark orange") ; axis(2, at=1:50, labels=rev(names(varImp)[1:50]),las=1, cex.axis=0.9)
#
# All GO, KEGG, TF combined
# File GO_KEGG_TF_1064_antiTNF_TotalDEG_mean_dists_vs_WT_TG.tsv contains distances calculated for the set of 
keggdist<-read.delim("Supplement/GO_KEGG_TF_1064_antiTNF_TotalDEG_mean_dists_vs_WT_TG.tsv", header=T, sep="\t")
# select KEGG+TF
keggdist<-keggdist[union(grep("KEGG_", keggdist$Pathways),grep("TF_", keggdist$Pathways)),]
n<-30
head(varImp, n)->top
names(top)->toppaths
which((keggdist$Pathway %in% toppaths)==T)->important
i<-important
#
which(keggdist$NoGenes>=25)->i
#
# Separate PathCat 2-D Plots
which(keggdist$PathCategory=="ProteinProcessing")->i
#
selkeggdistGG<-data.frame(Treatment="Infliximab3w", Pathway=keggdist$Pathways[i], Category=keggdist$GenCat[i], DistanceWt=keggdist$RemProphWt[i], DistanceTg=keggdist$RemProphTg[i])
selkeggdistGG<-rbind(selkeggdistGG,data.frame(Treatment="Infliximab6w", Pathway=keggdist$Pathways[i], Category=keggdist$GenCat[i], DistanceWt=keggdist$RemTherWt[i], DistanceTg=keggdist$RemTherTg[i]))
selkeggdistGG<-rbind(selkeggdistGG,data.frame(Treatment="Adalimumab6w", Pathway=keggdist$Pathways[i], Category=keggdist$GenCat[i], DistanceWt=keggdist$HumTherWt[i], DistanceTg=keggdist$HumTherTg[i]))
selkeggdistGG<-rbind(selkeggdistGG,data.frame(Treatment="Etanercept6w", Pathway=keggdist$Pathways[i], Category=keggdist$GenCat[i], DistanceWt=keggdist$EnbTherWt[i], DistanceTg=keggdist$EnbTherTg[i]))
selkeggdistGG<-rbind(selkeggdistGG,data.frame(Treatment="Certolizumab6w", Pathway=keggdist$Pathways[i], Category=keggdist$GenCat[i], DistanceWt=keggdist$CimTherWt[i], DistanceTg=keggdist$CimTherTg[i]))
# adding efficiency score
selkeggdistGG<-data.frame(selkeggdistGG, Efficiency=log10(abs(selkeggdistGG$DistanceTg)/abs(selkeggdistGG$DistanceWt)))
# ggplot
gp<-ggplot(selkeggdistGG, aes(x=DistanceWt, y=DistanceTg, label=Category), main="Most Important Pathways")
gp + xlim(-1.2, 1.2) + ylim(-2, 0.1) + scale_color_manual(values=adjustcolor(pcols[c(2,3,5,7,8)], alpha=0.8)) + geom_density_2d(aes(colour=Treatment)) + labs(colour="Treatment") +ylab("Distance from Tg") +xlab("Distance from Wt") + geom_hline(yintercept=0, colour="dark grey") + geom_vline(xintercept=0, colour="dark grey") #+ geom_text() # to be included if you need tags on plot

# Multiple plots
#
ii<-which(selkeggdistGG$Treatment=="Infliximab3w")
infl3gp<-ggplot(selkeggdistGG[ii,], aes(x=DistanceWt, y=DistanceTg, label="")) + xlim(-1.2, 1.2) + ylim(-2, 0.1) + scale_color_manual(values=adjustcolor(pcols[2], alpha=0.8)) + geom_density_2d(aes(colour=Treatment)) + labs(colour="Treatment") +ylab("Distance from Tg") +xlab("Distance from Wt") + geom_hline(yintercept=0, colour="dark grey") + geom_vline(xintercept=0, colour="dark grey") + geom_text()
#
ii<-which(selkeggdistGG$Treatment=="Infliximab6w")
infl6gp<-ggplot(selkeggdistGG[ii,], aes(x=DistanceWt, y=DistanceTg, label="")) + xlim(-1.2, 1.2) + ylim(-2, 0.1) + scale_color_manual(values=adjustcolor(pcols[3], alpha=0.8)) + geom_density_2d(aes(colour=Treatment)) + labs(colour="Treatment") +ylab("Distance from Tg") +xlab("Distance from Wt") + geom_hline(yintercept=0, colour="dark grey") + geom_vline(xintercept=0, colour="dark grey") + geom_text()
#
ii<-which(selkeggdistGG$Treatment=="Adalimumab6w")
adal6gp<-ggplot(selkeggdistGG[ii,], aes(x=DistanceWt, y=DistanceTg, label="")) + xlim(-1.2, 1.2) + ylim(-2, 0.1) + scale_color_manual(values=adjustcolor(pcols[5], alpha=0.8)) + geom_density_2d(aes(colour=Treatment)) + labs(colour="Treatment") +ylab("Distance from Tg") +xlab("Distance from Wt") + geom_hline(yintercept=0, colour="dark grey") + geom_vline(xintercept=0, colour="dark grey") + geom_text()
#
ii<-which(selkeggdistGG$Treatment=="Etanercept6w")
etan6gp<-ggplot(selkeggdistGG[ii,], aes(x=DistanceWt, y=DistanceTg, label="")) + xlim(-1.2, 1.2) + ylim(-2, 0.1) + scale_color_manual(values=adjustcolor(pcols[7], alpha=0.8)) + geom_density_2d(aes(colour=Treatment)) + labs(colour="Treatment") +ylab("Distance from Tg") +xlab("Distance from Wt") + geom_hline(yintercept=0, colour="dark grey") + geom_vline(xintercept=0, colour="dark grey") + geom_text()
#
ii<-which(selkeggdistGG$Treatment=="Certolizumab6w")
cert6gp<-ggplot(selkeggdistGG[ii,], aes(x=DistanceWt, y=DistanceTg, label=""))+ xlim(-1.2, 1.2) + ylim(-2, 0.1) + scale_color_manual(values=adjustcolor(pcols[8], alpha=0.8)) + geom_density_2d(aes(colour=Treatment)) + labs(colour="Treatment") +ylab("Distance from Tg") +xlab("Distance from Wt") + geom_hline(yintercept=0, colour="dark grey") + geom_vline(xintercept=0, colour="dark grey") + geom_text()
#
ggarrange(infl3gp, infl6gp, adal6gp, etan6gp, cert6gp, labels=c("Infliximab3w", "Infliximab6w","Adalimumab6w","Etanercept6w","Certolizumab6w"), ncol=3, nrow=2)


```

# Treatment Efficiency calculated on the basis of 2D Analysis (Figure 4B, Supplementary Figure 13)
Profile Efficiency Analysis combined with RF. RF is used to extract most important functional terms for which an efficiency measure is used.
```{r Profile Efficiency Analysis}
# Part 1: Creation of Features
pathways<-read.delim("Supplement/KEGG_mmu_pathways.tsv", header=F, sep="\t")
#pathways<-read.delim("Supplement/mm9_TF_targets.tsv", header=F, sep="\t")
#pathways<-read.delim("Supplement/mm9_GO_30_100genes.tsv", header=F, sep="\t")
# All GO, KEGG, TF combined
pathways<-read.delim("Supplement/mm9_KEGG_TF_GO_30_100genes.tsv", header=F, sep="\t")
# Select KEGG, TF only
#pathways<-pathways[union(grep("KEGG_", pathways$V2),grep("TF_", pathways$V2)),]
#
noGenes<-vector(mode="numeric", length=length(pathways[,1]))
for(i in 1:length(pathways[,1])){
unlist(strsplit(as.character(pathways[i,3]),split=","))->genes
noGenes[i]<-length(genes)
}
pathways<-cbind(kegg=pathways[,1], GeneNo=noGenes, pathway=pathways[,2], genes=as.data.frame(pathways[,3]))
which(pathways$GeneNo>=10)->k
pathways<-pathways[k,]
mat<-matrix(0, nrow=66, ncol=length(k))
for(i in 1:length(k)){
unlist(strsplit(as.character(pathways[i,4]),split=","))->genes
mat[,i]<-apply(tqnormdata[,which(colnames(tqnormdata) %in% genes)], 1, FUN=mean)
}
# Create names of features
names<-gsub("-","_", pathways[,3])
names<-gsub("/","", names)
names<-gsub("\\(","", names)
names<-gsub("\\)","", names)
names<-gsub("–","_", names)
names<-gsub(",","", names)
#
colnames(mat)<-names
dataKEGG<-cbind(State=tqnormdata[,1], as.data.frame(mat))
#
xx<-27:66
#xx<-corindexes-1
dataRF<-dataKEGG[xx,]
factor(dataRF$State)->dataRF$State
states<-length(table(dataRF$State))
varImp<-0;
error<-100;
errorprog<-100
for(i in 1:100){
  randomForest(State~., data=dataRF)->rf; 
  scalederror<-(rf$confusion[,(states+1)]*rowSums(rf$confusion[,1:states]))/(states+1)	
  if(mean(scalederror)<error){
    error<-mean(scalederror)
    bestmodel<-rf
    varImp<-rf$importance
    erroprog<-c(errorprog, error)	
    }
}  
varImp[order(varImp, decreasing=T),]->varImp
#keggdist<-read.delim("~Supplement/KEGG_1064_antiTNF_TotalDEG_mean_dists_vs_WT_TG.tsv", header=T, sep="\t")
#keggdist<-read.delim("~/Dropbox/Articles/collaborations/PharmacoTranscriptomics_Biomedcode/GO_1064_antiTNF_TotalDEG_mean_dists_vs_WT_TG.tsv", header=T, sep="\t")
#keggdist<-read.delim("~/Dropbox/Articles/collaborations/PharmacoTranscriptomics_Biomedcode/TF_1064_antiTNF_TotalDEG_mean_dists_vs_WT_TG.tsv", header=T, sep="\t");
# All GO, KEGG, TF combined
keggdist<-read.delim("~/Dropbox/Articles/collaborations/PharmacoTranscriptomics_Biomedcode/GO_KEGG_TF_1064_antiTNF_TotalDEG_mean_dists_vs_WT_TG.tsv", header=T, sep="\t")
#
n<-50
head(varImp, n)->top
names(top)->toppaths
which((keggdist$Pathway %in% toppaths)==T)->important
i<-important
#
# Per PathCategory Plots
grep("ImmuneDisease", keggdist$PathCategory)->i
selkeggdistGG<-data.frame(Treatment="Infliximab3w", Pathway=keggdist$Pathways[i], Category=keggdist$GenCat[i], DistanceWt=keggdist$RemProphWt[i], DistanceTg=keggdist$RemProphTg[i])
selkeggdistGG<-rbind(selkeggdistGG,data.frame(Treatment="Infliximab6w", Pathway=keggdist$Pathways[i], Category=keggdist$GenCat[i], DistanceWt=keggdist$RemTherWt[i], DistanceTg=keggdist$RemTherTg[i]))
selkeggdistGG<-rbind(selkeggdistGG,data.frame(Treatment="Adalimumab6w", Pathway=keggdist$Pathways[i], Category=keggdist$GenCat[i], DistanceWt=keggdist$HumTherWt[i], DistanceTg=keggdist$HumTherTg[i]))
selkeggdistGG<-rbind(selkeggdistGG,data.frame(Treatment="Etanercept6w", Pathway=keggdist$Pathways[i], Category=keggdist$GenCat[i], DistanceWt=keggdist$EnbTherWt[i], DistanceTg=keggdist$EnbTherTg[i]))
selkeggdistGG<-rbind(selkeggdistGG,data.frame(Treatment="Certolizumab6w", Pathway=keggdist$Pathways[i], Category=keggdist$GenCat[i], DistanceWt=keggdist$CimTherWt[i], DistanceTg=keggdist$CimTherTg[i]))
# adding efficiency score
selkeggdistGG<-data.frame(selkeggdistGG, Efficiency=log10(abs(selkeggdistGG$DistanceTg)/abs(selkeggdistGG$DistanceWt)))
#
factor(selkeggdistGG$Pathway)->selkeggdistGG$Pathway
factor(selkeggdistGG$Treatment)->selkeggdistGG$Treatment
pathways<-levels(selkeggdistGG$Pathway)
treatments<-levels(selkeggdistGG$Treatment)
# create a matrix
category<-vector(mode="character", length=length(pathways))
gini<-vector(mode="numeric", length=length(pathways))
m<-matrix(0, nrow=length(pathways), ncol=length(treatments))
for(i in 1:length(pathways)){
  for(j in 1:length(treatments)){
  x<-which(selkeggdistGG$Pathway==pathways[i] & selkeggdistGG$Treatment==treatments[j]); 
  m[i,j]<-selkeggdistGG[x,6]; category[i]<-as.character(selkeggdistGG$Category[x]); 
  gini[i]<-keggdist$NoGenes[which(keggdist$Pathways==pathways[i])]
  }
}
ginid<-discretize(gini, method="interval", categories=10)
row.names(m)<-pathways
colnames(m)<-treatments
# heatmap
cols<-colorRampPalette(c("steelblue4","white","firebrick4"))(256)
heatmap.2(m, hclustfun = function(x) hclust(x,method = 'ward.D2'), scale="none", mar=c(10,20), col=cols, RowSideColors=heat.colors(length(levels(ginid)))[ginid], cexRow = 1, cexCol = 1.4, trace="none", density.info="none", key.xlab="Efficiency Score", cellnote=round(m, digits=2), notecol="black", notecex=0.8)
#
##################
# Total Aggregative Analysis
keggdist[grep("KEGG", keggdist$Pathways),]->keggdistonly
factor(keggdistonly$PathCategory)->keggdistonly$PathCategory
mm<-0
levels(keggdistonly$PathCategory)->ipath
ipath<-ipath[c(2:22,24:29,31)]
#paths<-0
for (ik in 1:length(ipath))
  {
  grep(ipath[ik], keggdist$PathCategory)->i

#
selkeggdistGG<-data.frame(Treatment="Infliximab3w", Pathway=keggdist$Pathways[i], Category=keggdist$GenCat[i], DistanceWt=keggdist$RemProphWt[i], DistanceTg=keggdist$RemProphTg[i])
selkeggdistGG<-rbind(selkeggdistGG,data.frame(Treatment="Infliximab6w", Pathway=keggdist$Pathways[i], Category=keggdist$GenCat[i], DistanceWt=keggdist$RemTherWt[i], DistanceTg=keggdist$RemTherTg[i]))
selkeggdistGG<-rbind(selkeggdistGG,data.frame(Treatment="Adalimumab6w", Pathway=keggdist$Pathways[i], Category=keggdist$GenCat[i], DistanceWt=keggdist$HumTherWt[i], DistanceTg=keggdist$HumTherTg[i]))
selkeggdistGG<-rbind(selkeggdistGG,data.frame(Treatment="Etanercept6w", Pathway=keggdist$Pathways[i], Category=keggdist$GenCat[i], DistanceWt=keggdist$EnbTherWt[i], DistanceTg=keggdist$EnbTherTg[i]))
selkeggdistGG<-rbind(selkeggdistGG,data.frame(Treatment="Certolizumab6w", Pathway=keggdist$Pathways[i], Category=keggdist$GenCat[i], DistanceWt=keggdist$CimTherWt[i], DistanceTg=keggdist$CimTherTg[i]))
# adding efficiency score
selkeggdistGG<-data.frame(selkeggdistGG, Efficiency=log10(abs(selkeggdistGG$DistanceTg)/abs(selkeggdistGG$DistanceWt)))
#
factor(selkeggdistGG$Pathway)->selkeggdistGG$Pathway
factor(selkeggdistGG$Treatment)->selkeggdistGG$Treatment
pathways<-levels(selkeggdistGG$Pathway)
treatments<-levels(selkeggdistGG$Treatment)
# create a matrix
category<-vector(mode="character", length=length(pathways))
gini<-vector(mode="numeric", length=length(pathways))
m<-matrix(0, nrow=length(pathways), ncol=length(treatments))
for(i in 1:length(pathways)){
  for(j in 1:length(treatments)){
  x<-which(selkeggdistGG$Pathway==pathways[i] & selkeggdistGG$Treatment==treatments[j]); 
  m[i,j]<-selkeggdistGG[x,6]; category[i]<-as.character(selkeggdistGG$Category[x]); 
  gini[i]<-keggdist$NoGenes[which(keggdist$Pathways==pathways[i])]
  }
}
ginid<-discretize(gini, method="interval", categories=10)
row.names(m)<-pathways
colnames(m)<-treatments
# heatmap
cols<-colorRampPalette(c("steelblue4","white","firebrick4"))(256)
heatmap.2(m, hclustfun = function(x) hclust(x,method = 'ward.D2'), scale="none", mar=c(10,20), col=cols, RowSideColors=heat.colors(length(levels(ginid)))[ginid], cexRow = 1, cexCol = 1.4, trace="none", density.info="none", key.xlab="Efficiency Score", cellnote=round(m, digits=2), notecol="black", notecex=0.8)
apply(unlist(m), 2, FUN=mean)->out
mm<-rbind(mm, out)
}
mm<-mm[2:length(mm[,1]),]
keggPathCatEfficiencyMatrix<-data.frame(PathCategory=ipath, Infliximab3w=mm[,1], Infliximab6w=mm[,2] , Adalimumab6w=mm[,3] , Etanercept6w=mm[,4], Certolizumab6w=mm[,5] )
heatmap.2(as.matrix(keggPathCatEfficiencyMatrix[,2:6]), hclustfun = function(x) hclust(x,method = 'ward.D2'), scale="none", mar=c(10,15), col=hcols, cexRow = 1, cexCol = 1.4, trace="none", density.info="none", key.xlab="Mean Efficiency Score", cellnote=round(as.matrix(keggPathCatEfficiencyMatrix[,2:6]), digits=2), notecol="black", notecex=0.8, labRow = keggPathCatEfficiencyMatrix[,1])
```
